# Supplementary material for: Crystallographic observation of 'induced fit' in a cryptophane host–guest model system
Source: PubMed Central journal article supplement — Nat Commun. 2010 Dec 21;1:148–. doi: 10.1038/ncomms1151 (PMC3105606; doi:10.1038/ncomms1151), 2010-12-21
Supplement: ncomms1151-s1.pdf [file ncomms1151-s1.pdf]

## Supplementary Information

Crystallographic Observation of 'Induced Fit' in a Cryptophane Host-Guest Model System

*Olena Taratula, P. Aru Hill, Najat S. Khan, Patrick J. Carroll, and Ivan J. Dmochowski\**

*Department of Chemistry, University of Pennsylvania, 231 South 34<sup>th</sup> St., Philadelphia, PA 19104*

\*Corresponding author: Dmochowski, Ivan J.

Email: ivandmo@sas.upenn.edu

Fax: 215-573-6329

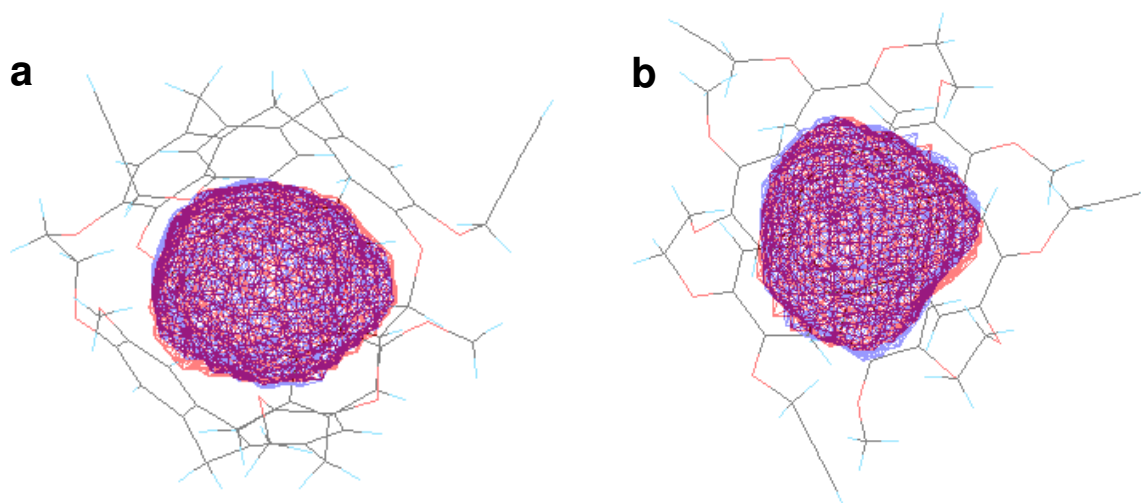

**Supplementary Figure S1 | Side (a) and top (b) views of tri-propargyl cryptophane 1.**

Internal cavities were calculated by Swiss Pdb Viewer for **1** only partially occupied (structure CC-1, blue) and with Xe as guest (structure **1**-Xe, red). The two overlaid cavities are virtually indistinguishable.

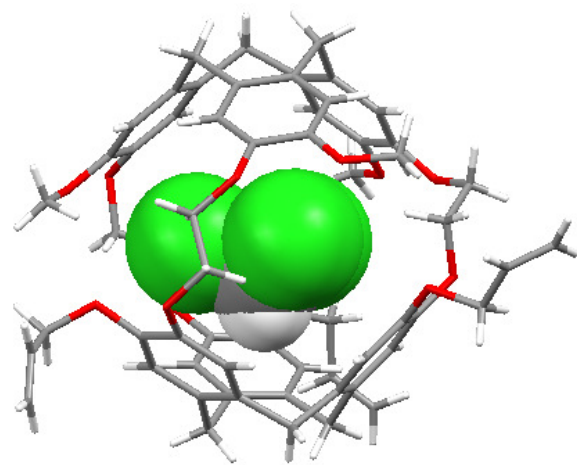

**Supplementary Figure S2 | X-ray crystal structure of CDCl<sub>3</sub>-2 complex in side view.**

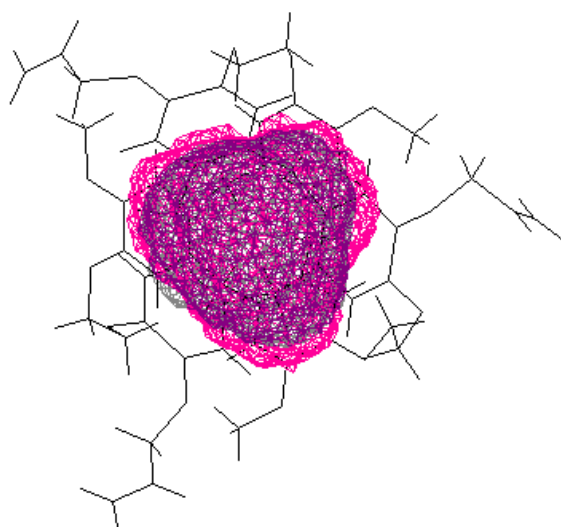

**Supplementary Figure S3 | Top view of X-ray crystal structure for tri-allyl cryptophane 2.**

Internal cavities were calculated by Swiss Pdb Viewer and overlaid for **2** complexed with MeOH (grey) and CDCl<sub>3</sub> (pink). The cavity is more compact with MeOH guest.

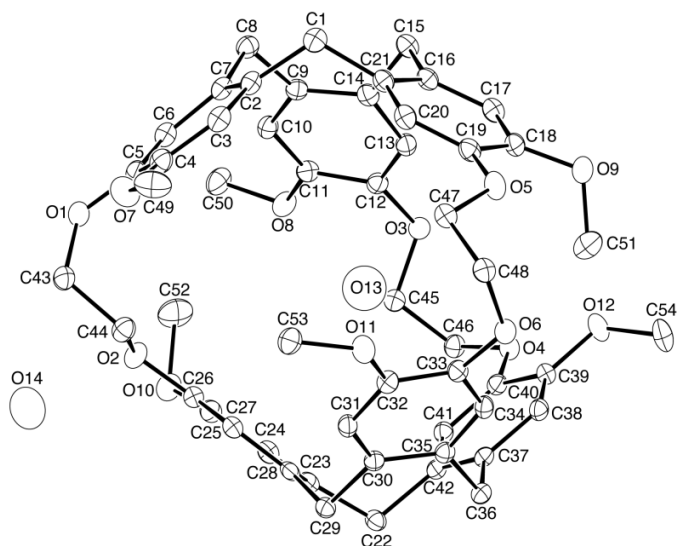

**Supplementary Figure S4a | ORTEP representations of cryptophane-A-H<sub>2</sub>O complex (CCDC-778896, shown at the 30% probability level).** Hydrogen atoms have been omitted for clarity. A model was devised that included what amounts to ¼ of a water molecule outside the cage and seven partially occupied oxygen positions inside the cage.

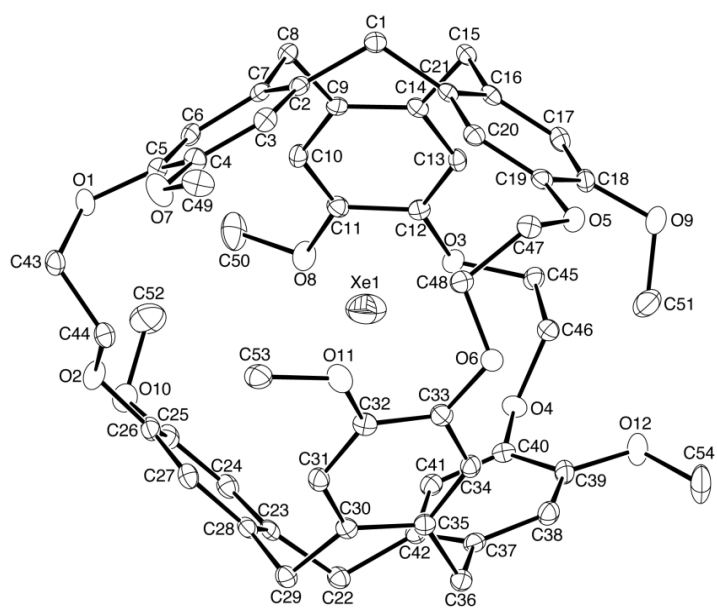

**Supplementary Figure S4b | ORTEP representations of cryptophane-A-Xe complex (CCDC-778897, shown at the 30% probability level). Hydrogen atoms have been omitted for clarity.**

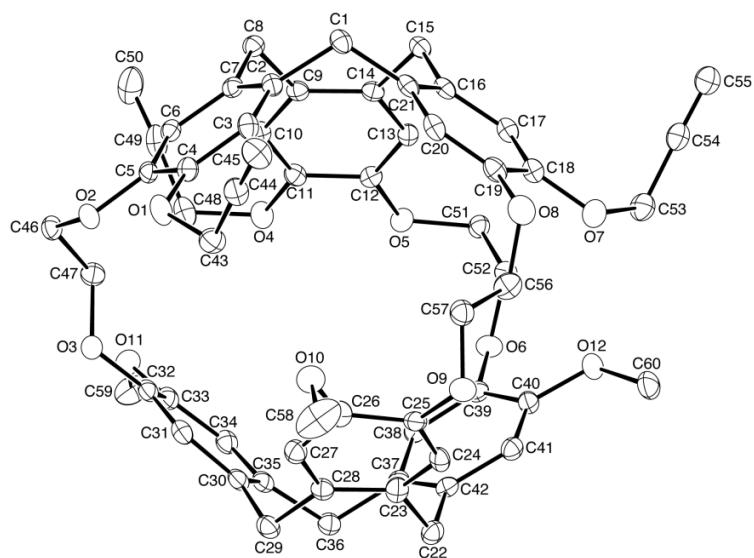

**Supplementary Figure S4c | ORTEP representations of only partially occupied tri-propargyl cryptophane 1 (CCDC-778902, shown at the 30% probability level). Hydrogen atoms have been omitted for clarity.**

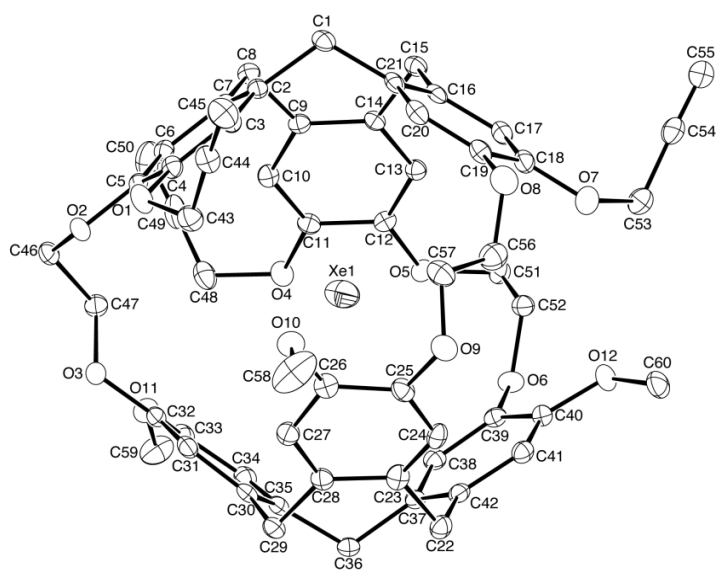

**Supplementary Figure S4d | ORTEP representations of tri-propargyl cryptophane 1-Xe complex (CCDC-778903, shown at the 30% probability level). Hydrogen atoms have been omitted for clarity.**

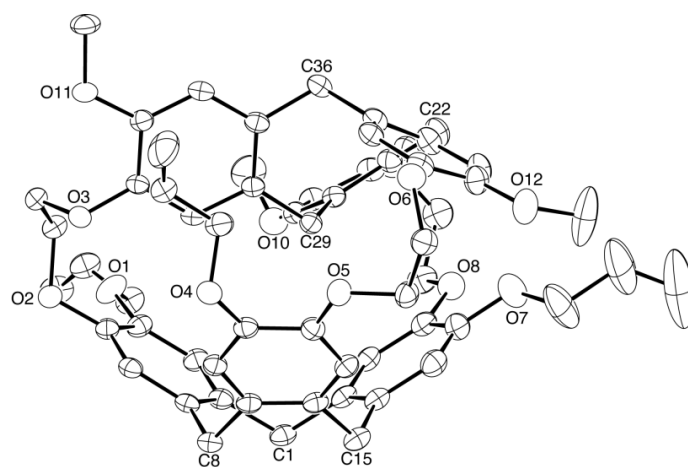

**Supplementary Figure S4e | ORTEP representations of collapsed tri-allyl cryptophane 2 (CCDC-778898, shown at the 30% probability level).** Hydrogen atoms have been omitted for clarity.



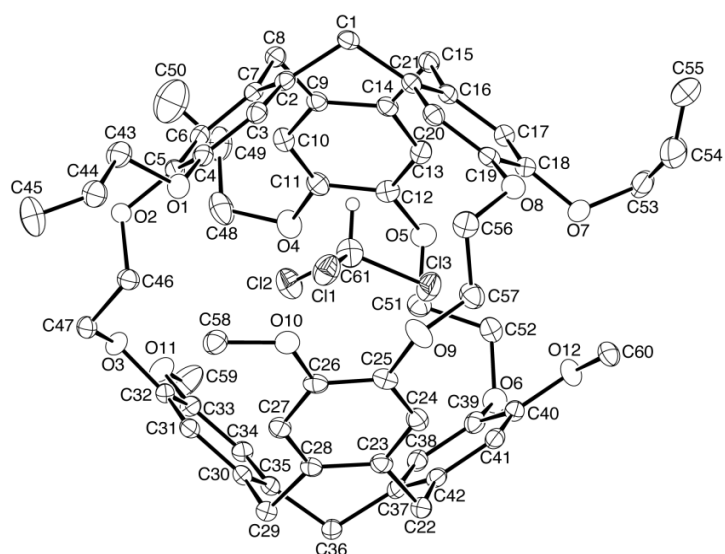

**Supplementary Figure S4f | ORTEP representations of tri-allyl cryptophane 2-CDCl<sub>3</sub> complex (CCDC-778899, shown at the 30% probability level).** Hydrogen atoms have been omitted for clarity. Here only conformer 1 is shown; the other has the same numbering scheme, but with "primes" on the numbers.

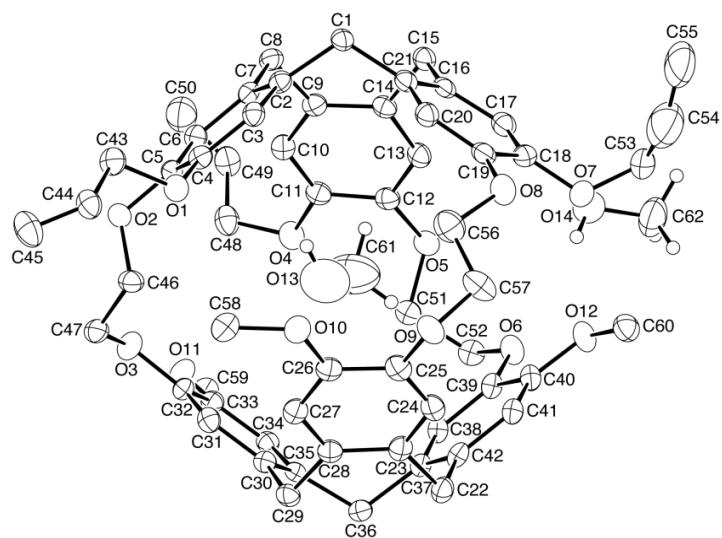

**Supplementary Figure S4g | ORTEP representations of tri-allyl cryptophane 2-MeOH complex (CCDC-778900, shown at the 30% probability level). Hydrogen atoms have been omitted for clarity.**

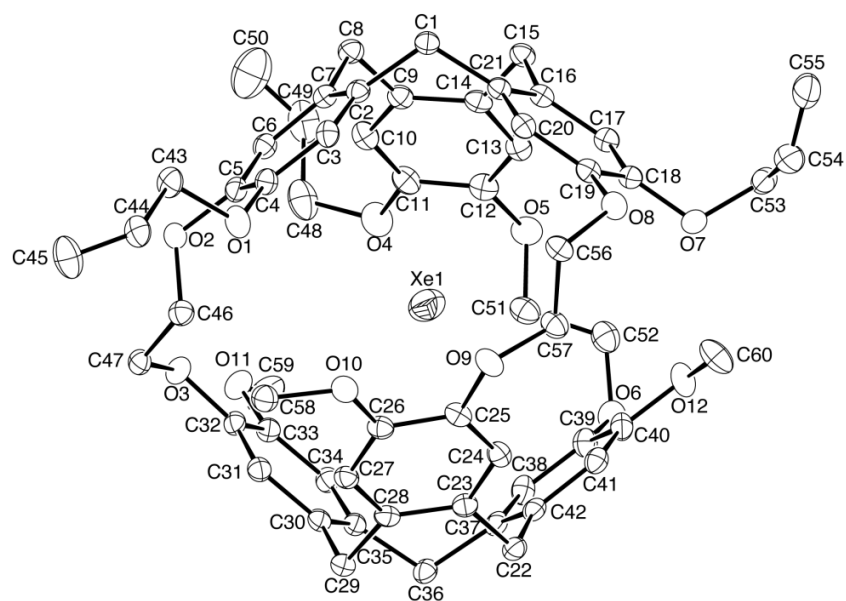

**Supplementary Figure S4h | ORTEP representations of tri-allyl cryptophane 2-Xe complex (CCDC-778901, shown at the 30% probability level).** Hydrogen atoms have been omitted for clarity. Here only conformer 1 is shown; the other has the same numbering scheme, but with "primes" on the numbers.

| Xe-atom | C-atom | <i>D</i> , Å | Xe-atom | C-atom | <i>D</i> , Å |
|---------|--------|--------------|---------|--------|--------------|
| Xe1     | C24    | 4.042(2)     | Xe1     | C34    | 4.365(2)     |
| Xe1     | C23    | 4.076(2)     | Xe1     | C10    | 4.366(2)     |
| Xe1     | C5     | 4.106(2)     | Xe1     | C40    | 4.371(2)     |
| Xe1     | C41    | 4.106(2)     | Xe1     | C37    | 4.372(2)     |
| Xe1     | C42    | 4.121(2)     | Xe1     | C17    | 4.378(2)     |
| Xe1     | C14    | 4.126(2)     | Xe1     | C21    | 4.410(2)     |
| Xe1     | C7     | 4.130(2)     | Xe1     | C11    | 4.457(3)     |
| Xe1     | C32    | 4.146(2)     | Xe1     | C26    | 4.484(2)     |
| Xe1     | C31    | 4.168(2)     | Xe1     | C27    | 4.492(2)     |
| Xe1     | C13    | 4.179(2)     | Xe1     | C38    | 4.621(2)     |
| Xe1     | C9     | 4.188(2)     | Xe1     | C39    | 4.645(2)     |
| Xe1     | C25    | 4.229(2)     | Xe1     | C18    | 4.609(2)     |
| Xe1     | C2     | 4.263(2)     | Xe1     | C19    | 4.727(2)     |
| Xe1     | C30    | 4.273(2)     | Xe1     | C20    | 4.627(2)     |
| Xe1     | C16    | 4.276(2)     | Xe1     | C46    | 4.535(2)     |
| Xe1     | C33    | 4.281(2)     | Xe1     | C47    | 5.209(2)     |
| Xe1     | C28    | 4.290(2)     | Xe1     | C51    | 4.565(3)     |
| Xe1     | C4     | 4.297(2)     | Xe1     | C52    | 5.282(3)     |
| Xe1     | C3     | 4.335(2)     | Xe1     | C56    | 5.411(2)     |
| Xe1     | C12    | 4.345(2)     | Xe1     | C57    | 4.684(3)     |
| Xe1     | C35    | 4.346(2)     |         |        |              |

**Supplementary Table S1 | Distances (*D*) calculated with ORTEP between Xe atom and nearest carbon atoms for tri-allyl cryptophane 2-Xe complex.** See Supplementary Figure S4h for atom labeling. Closest carbon atoms come from the phenyl rings of the CTGs. Calculated Xe-carbon atom distances for the ethylene linkers are reported under dotted line.

| 2-CDCl <sub>3</sub> | -2-MeOH | <i>D</i> , Å | 2-CDCl <sub>3</sub> | -2-MeOH | <i>D</i> , Å |
|---------------------|---------|--------------|---------------------|---------|--------------|
| O9                  | - O9    | 0.522        | C27                 | - C27   | 0.166        |
| O8                  | - O8    | 0.559        | C26                 | - C26   | 0.161        |
| O6                  | - O6    | 0.89         | C25                 | - C25   | 0.270        |
| O5                  | - O5    | 0.288        | C24                 | - C24   | 0.251        |
| O3                  | - O3    | 0.141        | C23                 | - C23   | 0.145        |
| O2                  | - O2    | 0.136        | C22                 | - C22   | 0.101        |
| C57                 | - C57   | 0.618        | C21                 | - C21   | 0.202        |
| C56                 | - C56   | 0.647        | C20                 | - C20   | 0.313        |
| C52                 | - C52   | 1.056        | C19                 | - C19   | 0.339        |
| C51                 | - C51   | 0.583        | C18                 | - C18   | 0.232        |
| C47                 | - C47   | 0.141        | C17                 | - C17   | 0.167        |
| C46                 | - C46   | 0.117        | C16                 | - C16   | 0.158        |
| C42                 | - C42   | 0.22         | C15                 | - C15   | 0.130        |
| C41                 | - C41   | 0.289        | C14                 | - C14   | 0.106        |
| C40                 | - C40   | 0.426        | C13                 | - C13   | 0.189        |
| C39                 | - C39   | 0.544        | C12                 | - C12   | 0.240        |
| C38                 | - C38   | 0.454        | C11                 | - C11   | 0.204        |
| C37                 | - C37   | 0.293        | C10                 | - C10   | 0.125        |
| C36                 | - C36   | 0.263        | C9                  | - C9    | 0.075        |
| C35                 | - C35   | 0.236        | C8                  | - C8    | 0.031        |
| C34                 | - C34   | 0.220        | C7                  | - C7    | 0.040        |
| C33                 | - C33   | 0.197        | C6                  | - C6    | 0.092        |
| C32                 | - C32   | 0.182        | C5                  | - C5    | 0.082        |
| C31                 | - C31   | 0.193        | C4                  | - C4    | 0.056        |
| C30                 | - C30   | 0.219        | C3                  | - C3    | 0.105        |
| C29                 | - C29   | 0.197        | C2                  | - C2    | 0.089        |
| C28                 | - C28   | 0.141        | C1                  | - C1    | 0.156        |

**Supplementary Table S2 | Distances (*D*) between matched atoms generated with CrystMol**

**2.1 for 2-CDCl<sub>3</sub> complex superimposed with 2-MeOH complex.** See Supplementary Figures

S4f and S4g for atom labeling.

| Compound                          | CCDC-778896<br>(Crypt.-A + H <sub>2</sub> O),        | CCDC-778897<br>(Crypt.-A + Xe),                    |
|-----------------------------------|------------------------------------------------------|----------------------------------------------------|
| Empirical formula                 | C <sub>54</sub> H <sub>54</sub> O <sub>13.25</sub>   | C <sub>54</sub> H <sub>54</sub> O <sub>12</sub> Xe |
| Formula weight                    | 914.97                                               | 1026.27                                            |
| Crystal system                    | monoclinic                                           | monoclinic                                         |
| Space group                       | P2 <sub>1</sub> /c                                   | P2 <sub>1</sub> /c                                 |
| Cell constants:                   |                                                      |                                                    |
| a                                 | 22.2761(15) Å                                        | 22.0490(9) Å                                       |
| b                                 | 11.2688(6) Å                                         | 11.4109(5) Å                                       |
| c                                 | 20.5348(14) Å                                        | 20.7802(9) Å                                       |
| α                                 | 90.000                                               | 90.000                                             |
| β                                 | 113.8120(10)°                                        | 117.599(2)°                                        |
| γ                                 | 90.000                                               | 90.000                                             |
| Volume                            | 4715.9(5) Å <sup>3</sup>                             | 4633.4(3) Å <sup>3</sup>                           |
| Z                                 | 4                                                    | 4                                                  |
| Density (calculated)              | 1.292 g/cm <sup>3</sup>                              | 1.471 g/cm <sup>3</sup>                            |
| Absorption coefficient            | 0.92 cm <sup>-1</sup>                                | 8.10 cm <sup>-1</sup>                              |
| F(000)                            | 1946                                                 | 2112                                               |
| Crystal size                      | 0.42 x 0.22 x 0.08 mm <sup>3</sup>                   | 0.28 x 0.20 x 0.05 mm <sup>3</sup>                 |
| Theta range for data collection   | 2.51 to 25.03°                                       | 5.12 to 50.1°                                      |
| Index ranges                      | -26 ≤ h ≤ 24, -13 ≤ k ≤ 13, -24 ≤ l ≤ 24             | -26 ≤ h ≤ 26; -13 ≤ k ≤ 13; -24 ≤ l ≤ 24           |
| Reflections collected             | 35655                                                | 36314                                              |
| Independent reflections           | 8293 [R(int) = 0.0252]                               | 8203 [R(int)=0.0306]                               |
| Completeness to maximum theta     | 99.5%                                                | 99.8%                                              |
| Absorption correction             | Semi-empirical from equivalents                      | Semi-empirical from equivalents                    |
| Max. and min. transmission        | 1.0000 and 0.8747                                    | 1.0000 and 0.9181                                  |
| Data / restraints / parameters    | 8293 / 0 / 640                                       | 8203 / 0 / 611                                     |
| Goodness-of-fit on F <sup>2</sup> | 1.067                                                | 1.082                                              |
| Final R indices [I>2σ(I)]         | R <sub>1</sub> = 0.0483,<br>wR <sub>2</sub> = 0.1218 | R <sub>1</sub> =0.0410,<br>wR <sub>2</sub> =0.0804 |
| R indices (all data)              | R <sub>1</sub> = 0.0571, wR <sub>2</sub> = 0.1302    | R <sub>1</sub> =0.0581,<br>wR <sub>2</sub> =0.0888 |
| Extinction coefficient            | 0.0028(4)                                            | not refined                                        |
| Largest diff. peak and hole       | 0.403 and -0.269 e/Å <sup>3</sup>                    | 0.805 and -1.183 e/Å <sup>3</sup>                  |

**Supplementary Table S3 | Summary of structure determination data for CCDC-778896 and 778897.**

| Compound                        | CCDC-778902<br>(1 partial fill)                 | CCDC-778903<br>(1 + Xe)                            | CCDC-778898<br>(2 collapsed)                       |
|---------------------------------|-------------------------------------------------|----------------------------------------------------|----------------------------------------------------|
| Empirical formula               | C <sub>60</sub> H <sub>54</sub> O <sub>12</sub> | C <sub>60</sub> H <sub>54</sub> O <sub>12</sub> Xe | C <sub>60</sub> H <sub>60</sub> O <sub>12</sub>    |
| Formula weight                  | 967.03                                          | 1098.33                                            | 973.08                                             |
| Crystal system                  | triclinic                                       | triclinic                                          | monoclinic                                         |
| Space group                     | P $\bar{1}$                                     | P $\bar{1}$                                        | P2 <sub>1</sub> /n                                 |
| Cell constants:                 |                                                 |                                                    |                                                    |
| a                               | 11.8090(13) Å                                   | 11.8046(10) Å                                      | 15.917(2) Å                                        |
| b                               | 12.9971(15) Å                                   | 12.9936(11) Å                                      | 12.4013(11) Å                                      |
| c                               | 17.8807(19) Å                                   | 17.8574(15) Å                                      | 28.262(3) Å                                        |
| $\alpha$                        | 89.531(4)°                                      | 89.704(3)°                                         | 90.000                                             |
| $\beta$                         | 89.764(4)°                                      | 89.716(3)°                                         | 105.389(3)°                                        |
| $\gamma$                        | 88.396(3)°                                      | 88.259(3)°                                         | 90.000                                             |
| Volume                          | 2743.2(5) Å <sup>3</sup>                        | 2737.7(4) Å <sup>3</sup>                           | 5378.8(9) Å <sup>3</sup>                           |
| Z                               | 2                                               | 2                                                  | 4                                                  |
| Density (calculated)            | 1.171 g/cm <sup>3</sup>                         | 1.332 g/cm <sup>3</sup>                            | 1.202 g/cm <sup>3</sup>                            |
| Absorption coefficient          | 0.81 cm <sup>-1</sup>                           | 6.91 cm <sup>-1</sup>                              | 0.83 cm <sup>-1</sup>                              |
| F(000)                          | 1020                                            | 1128                                               | 2064                                               |
| Crystal size                    | 0.28 x 0.18 x 0.15<br>mm <sup>3</sup>           | 0.46 x 0.10 x 0.08<br>mm <sup>3</sup>              | 0.38 x 0.20 x 0.15<br>mm <sup>3</sup>              |
| Theta range for data collection | 2.56 to 25.02°                                  | 2.56 to 25.01°                                     | 5.3 to 50.02°                                      |
| Index ranges                    | -14 ≤ h ≤ 14, -15 ≤ k ≤ 15, -19 ≤ l ≤ 21        | -14 ≤ h ≤ 14, -15 ≤ k ≤ 15, -21 ≤ l ≤ 20           | -18 ≤ h ≤ 15; -12 ≤ k ≤ 14; -33 ≤ l ≤ 32           |
| Reflections collected           | 42110                                           | 40228                                              | 21843                                              |
| Independent reflections         | 9641 [R(int) = 0.0248]                          | 9620 [R(int) = 0.0264]                             | 9274 [R(int)=0.0272]                               |
| Completeness to maximum theta   | 99.5%                                           | 99.7%                                              | 99.3%                                              |
| Absorption correction           | Semi-empirical from equivalents                 | Semi-empirical from equivalents                    | none                                               |
| Max. and min. transmission      | 1.0000 and 0.9235                               | 1.0000 and 0.8559                                  |                                                    |
| Data / restraints / parameters  | 9641 / 14 / 698                                 | 9620 / 14 / 707                                    | 9274 / 0 / 690                                     |
| Goodness-of-fit on F2           | 1.063                                           | 1.064                                              | 1.076                                              |
| Final R indices [I>2sigma(I)]   | R1 = 0.0527,<br>wR2 = 0.1531                    | R1 = 0.0462,<br>wR2 = 0.1273                       | R <sub>1</sub> =0.0698,<br>wR <sub>2</sub> =0.1991 |
| R indices (all data)            | R1 = 0.0597,<br>wR2 = 0.1604                    | R1 = 0.0546,<br>wR2 = 0.1350                       | R <sub>1</sub> =0.0841,<br>wR <sub>2</sub> =0.2171 |
| Extinction coefficient          | not refined                                     | not refined                                        | not refined                                        |
| Largest diff. peak and hole     | 0.265 and -0.253 e/Å <sup>3</sup>               | 0.587 and -0.933 e/Å <sup>3</sup>                  | 463 and -0.372 e/Å <sup>3</sup>                    |

**Supplementary Table S4 | Summary of structure determination data for CCDC-778898, -778902, -778903.**

| Compound                        | CCDC-778899<br>( <b>2</b> + CDCl <sub>3</sub> )                 | CCDC-778900<br>( <b>2</b> + MeOH)                   | CCDC-778901<br>( <b>2</b> + Xe)                    |
|---------------------------------|-----------------------------------------------------------------|-----------------------------------------------------|----------------------------------------------------|
| Empirical formula               | C <sub>61</sub> H <sub>61</sub> O <sub>12</sub> Cl <sub>3</sub> | C <sub>61.5</sub> H <sub>66</sub> O <sub>13.5</sub> | C <sub>60</sub> H <sub>60</sub> O <sub>12</sub> Xe |
| Formula weight                  | 1092.45                                                         | 1021.14                                             | 1104.38                                            |
| Crystal system                  | monoclinic                                                      | monoclinic                                          | monoclinic                                         |
| Space group                     | P2 <sub>1</sub> /c                                              | P2 <sub>1</sub> /c                                  | P2 <sub>1</sub> /c                                 |
| Cell constants:                 |                                                                 |                                                     |                                                    |
| a                               | 21.822(2)Å                                                      | 21.374(4)Å                                          | 21.594(2)Å                                         |
| b                               | 12.3143(11)Å                                                    | 11.973(2)Å                                          | 12.2085(11)Å                                       |
| c                               | 39.621(4)Å                                                      | 22.305(4)Å                                          | 39.916(4)Å                                         |
| α                               | 90.000                                                          | 90.000                                              | 90.000                                             |
| β                               | 97.3610(10)°                                                    | 111.010(4)°                                         | 97.674(2)°                                         |
| γ                               | 90.000                                                          | 90.000                                              | 90.000                                             |
| Volume                          | 10560(2)Å <sup>3</sup>                                          | 5329(2)Å <sup>3</sup>                               | 10429(2)Å <sup>3</sup>                             |
| Z                               | 8                                                               | 2                                                   | 8                                                  |
| Density (calculated)            | 1.374 g/cm <sup>3</sup>                                         | 1.273 g/cm <sup>3</sup>                             | 1.407 g/cm <sup>3</sup>                            |
| Absorption coefficient          | 2.40 cm <sup>-1</sup>                                           | 0.89 cm <sup>-1</sup>                               | 7.25 cm <sup>-1</sup>                              |
| F(000)                          | 4592                                                            | 2172                                                | 4560                                               |
| Crystal size                    | 0.32 x 0.25 x 0.25<br>mm <sup>3</sup>                           | 0.32 x 0.12 x 0.10<br>mm <sup>3</sup>               | 0.38 x 0.35 x 0.30<br>mm <sup>3</sup>              |
| Theta range for data collection | 5.02 to 50.04°                                                  | 5.02 to 50.04°                                      | 5.06 to 54.92°                                     |
| Index ranges                    | -25 ≤ h ≤ 25; -14 ≤ k ≤ 10; -47 ≤ l ≤ 40                        | -24 ≤ h ≤ 25; -14 ≤ k ≤ 9; -21 ≤ l ≤ 26             | -28 ≤ h ≤ 28; -14 ≤ k ≤ 15; -31 ≤ l ≤ 51           |
| Reflections collected           | 58766                                                           | 27444                                               | 67636                                              |
| Independent reflections         | 18536 [R(int)=0.0353]                                           | 9345 [R(int)=0.0455]                                | 23575 [R(int)=0.0423]                              |
| Completeness to maximum theta   | 99.4%                                                           | 99.4%                                               | 98.9%                                              |
| Absorption correction           | Semi-empirical from equivalents                                 | Semi-empirical from equivalents                     | Semi-empirical from equivalents                    |
| Max. and min. transmission      | 1.0000 and 0.7802                                               | 1.0000 and 0.7115                                   | 1.0000 and 0.7304                                  |
| No. parameters                  | 1385                                                            | 688                                                 | 1394                                               |
| Goodness-of-fit on F2           | 1.061                                                           | 1.048                                               | 1.036                                              |
| Final R indices [I>2σ(I)]       | R <sub>1</sub> =0.0634,<br>wR <sub>2</sub> =0.1661              | R <sub>1</sub> =0.0871,<br>wR <sub>2</sub> =0.2323  | R <sub>1</sub> =0.0574,<br>wR <sub>2</sub> =0.1583 |
| R indices (all data)            | R <sub>1</sub> =0.0820,<br>wR <sub>2</sub> =0.1835              | R <sub>1</sub> =0.1308,<br>wR <sub>2</sub> =0.2902  | R <sub>1</sub> =0.0725,<br>wR <sub>2</sub> =0.1715 |
| Extinction coefficient          | not refined                                                     | not refined                                         | not refined                                        |
| Largest diff. peak and hole     | +1.268 and -0.554 e/Å <sup>3</sup>                              | +0.688 and -0.428 e/Å <sup>3</sup>                  | +0.610 and -1.500 e/Å <sup>3</sup>                 |

**Supplementary Table S5 | Summary of structure determination data for CCDC-778899-778901.**
